# Supplementary material for: Development and Characterization of Econazole Topical Gel
Source: MDPI journal article supplement (doi:10.3390/gels9120929), 2023-11-25
Supplement: s1 [file s1]

# Supplementary Materials: Development and Characterization of Econazole Topical Gel

Mohammad F. Bayan <sup>1,\*</sup>, Balakumar Chandrasekaran <sup>1</sup> and Mohammad H. Alyami <sup>2</sup>

<sup>1</sup> Faculty of Pharmacy, Philadelphia University, P.O. Box 1, Amman 19392, Jordan;  
balakumar@philadelphia.edu.jo

<sup>2</sup> Department of Pharmaceutics, College of Pharmacy, Najran University, Najran 66462, Saudi Arabia;  
mhalmansour@nu.edu.sa

\* Correspondence: mbayan@philadelphia.edu.jo

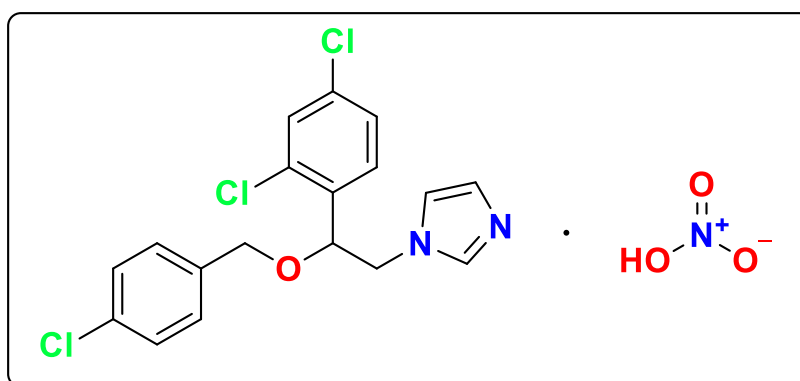

**Figure S1.** Chemical Structure of Econazole Nitrate

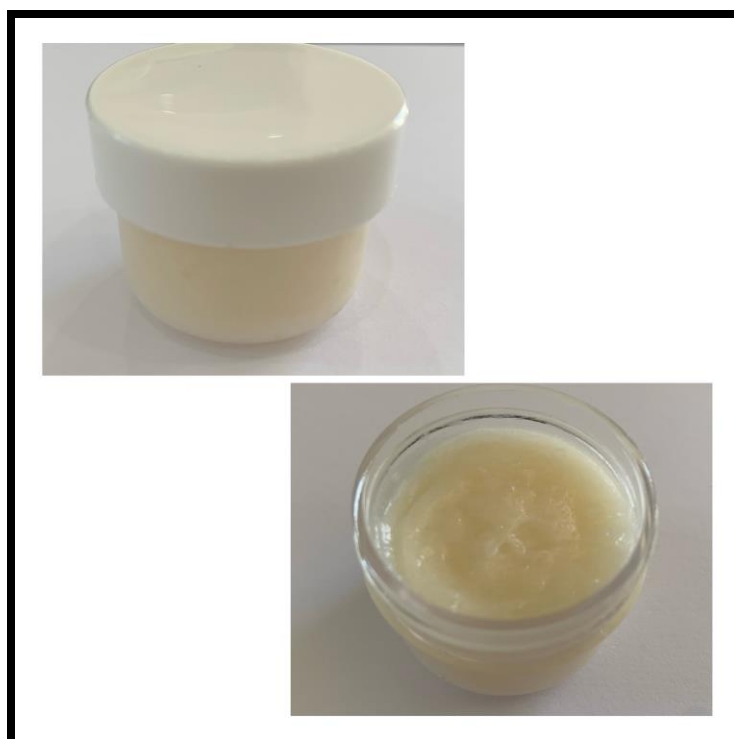

**Figure S2.** A picture of the topical econazole gel formulation

**Table S1. Stability of F1**

| Time (days) | pH        | Viscosity (cps) | Spreadability (cm) | Gel strength (s) |
|-------------|-----------|-----------------|--------------------|------------------|
| 0           | 6.1 ± 0.1 | 1341 ± 0.6      | 7.1 ± 0.2          | 59.9 ± 1.3       |
| 30          | 6.2 ± 0.2 | 1342 ± 0.8      | 7.0 ± 0.4          | 58.7 ± 1.1       |
| 90          | 6.0 ± 0.2 | 1341 ± 0.7      | 7.1 ± 0.1          | 58.2 ± 1.6       |
| 180         | 6.1 ± 0.2 | 1342 ± 0.5      | 7.1 ± 0.2          | 59.5 ± 1.2       |

**Table S2. Stability of F2**

| Time (days) | pH        | Viscosity (cps) | Spreadability (cm) | Gel strength (s) |
|-------------|-----------|-----------------|--------------------|------------------|
| 0           | 6.0 ± 0.1 | 1389 ± 0.9      | 6.5 ± 0.3          | 67.2 ± 0.8       |
| 30          | 5.9 ± 0.2 | 1390 ± 1.0      | 6.3 ± 0.2          | 66.8 ± 0.9       |
| 90          | 6.0 ± 0.1 | 1389 ± 0.7      | 6.4 ± 0.3          | 68.4 ± 1.5       |
| 180         | 6.0 ± 0.2 | 1389 ± 0.8      | 6.3 ± 0.2          | 66.5 ± 1.4       |

**Table S3. Stability of F3**

| Time (days) | pH        | Viscosity (cps) | Spreadability (cm) | Gel strength (s) |
|-------------|-----------|-----------------|--------------------|------------------|
| 0           | 6.1 ± 0.1 | 1432 ± 0.8      | 5.8 ± 0.2          | 72.1 ± 1.7       |
| 30          | 5.9 ± 0.3 | 1429 ± 1.5      | 5.8 ± 0.2          | 73.8 ± 2.0       |
| 90          | 5.9 ± 0.2 | 1431 ± 1.3      | 5.8 ± 0.1          | 70.6 ± 1.8       |
| 180         | 6.1 ± 0.2 | 1433 ± 1.4      | 5.7 ± 0.2          | 71.7 ± 1.1       |

**Table S4. Stability of F4**

| Time (days) | pH        | Viscosity (cps) | Spreadability (cm) | Gel strength (s) |
|-------------|-----------|-----------------|--------------------|------------------|
| 0           | 5.9 ± 0.2 | 1487 ± 0.5      | 5.3 ± 0.2          | 85.6 ± 1.2       |
| 30          | 6.1 ± 0.2 | 1485 ± 0.8      | 5.1 ± 0.3          | 86.5 ± 1.4       |
| 90          | 6.0 ± 0.2 | 1486 ± 0.6      | 5.2 ± 0.3          | 85.9 ± 1.6       |
| 180         | 6.0 ± 0.2 | 1488 ± 1.1      | 5.2 ± 0.1          | 87.2 ± 1.7       |

**Table S5. Stability of F5**

| Time (days) | pH        | Viscosity (cps) | Spreadability (cm) | Gel strength (s) |
|-------------|-----------|-----------------|--------------------|------------------|
| 0           | 6.2 ± 0.1 | 1515 ± 0.6      | 4.9 ± 0.1          | 104.2 ± 2.1      |
| 30          | 6.0 ± 0.1 | 1518 ± 1.9      | 4.8 ± 0.1          | 105.5 ± 2.6      |
| 90          | 6.0 ± 0.2 | 1517 ± 1.3      | 4.8 ± 0.1          | 106.4 ± 2.2      |
| 180         | 6.0 ± 0.1 | 1514 ± 1.2      | 4.9 ± 0.1          | 103.6 ± 1.9      |

**Table S6. Stability of F6**

| Time (days) | pH        | Viscosity (cps) | Spreadability (cm) | Gel strength (s) |
|-------------|-----------|-----------------|--------------------|------------------|
| 0           | 5.9 ± 0.1 | 1571 ± 0.8      | 4.4 ± 0.2          | 121.4 ± 1.5      |
| 30          | 6.1 ± 0.1 | 1570 ± 0.9      | 4.3 ± 0.1          | 122.2 ± 1.8      |
| 90          | 6.0 ± 0.2 | 1572 ± 0.8      | 4.3 ± 0.2          | 121.6 ± 1.8      |
| 180         | 5.9 ± 0.2 | 1570 ± 1.1      | 4.3 ± 0.1          | 121.2 ± 1.7      |
